# Supplementary material for: Highly enhanced bifunctional electrocatalytic activity of mixed copper–copper oxides on nickel foam via composition control
Source: Royal Society of Chemistry journal article supplement (doi:10.1039/d0nj02311f), 2020-01-01
Supplement: d0nj02311f1.pdf [file d0nj02311f1.pdf]

## Highly Enhanced Bifunctional Electrocatalytic Activity of Mixed Copper-Copper Oxides via Controlling Composition and Fabricating on Nickel Foam

Pandi Muthukumar,<sup>a</sup> Mehboobali Pannipara,<sup>b,c</sup> Abdullah G. Al-Sehemi,<sup>b,c</sup> and Savarimuthu Philip Anthony<sup>a\*</sup>

<sup>a</sup>School of Chemical & Biotechnology, SASTRA Deemed University  
Thanjavur-613401, India. E-mail: [philip@biotech.sastra.edu](mailto:philip@biotech.sastra.edu)

<sup>b</sup>Department of Chemistry, King Khalid University, Abha 61413, Saudi Arabia.

<sup>c</sup>Research center for Advanced Materials Science, King Khalid University, Abha 61413,  
Saudi Arabia.

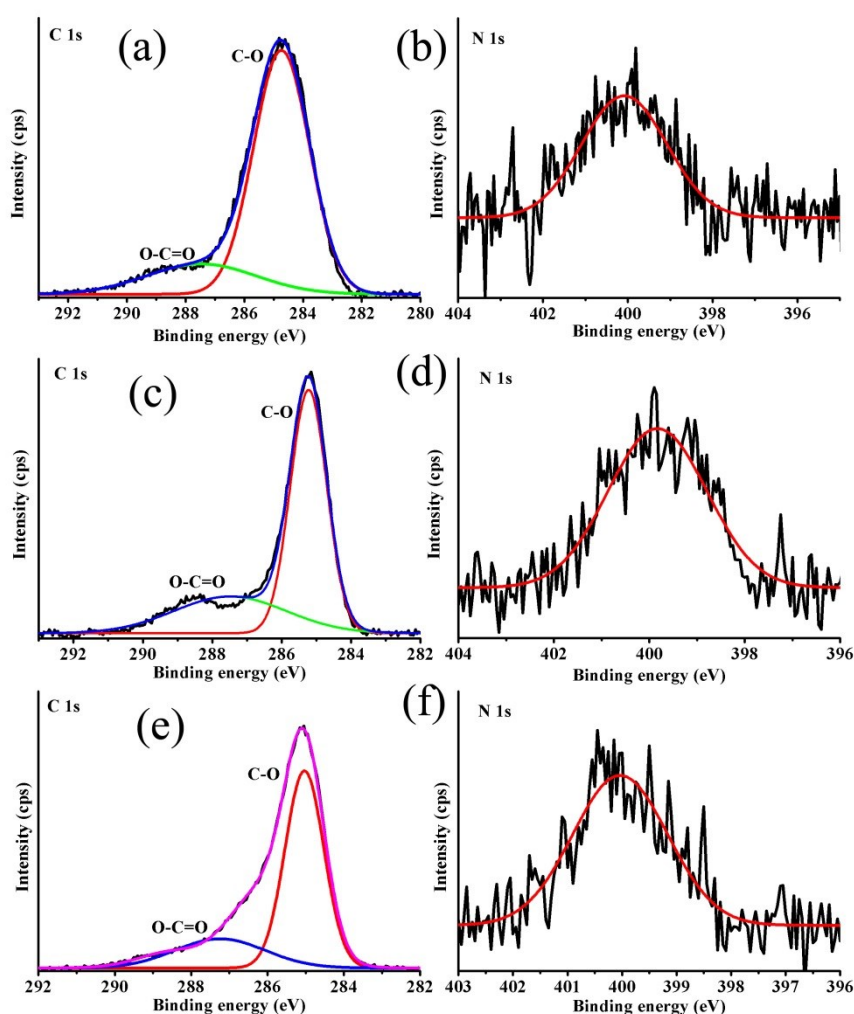

Figure S1. High resolution XPS spectra of C 1s and N 1s (a, b) Cu@NF, (c, d) Cu<sub>2</sub>O@NF and (e, f) CuO@NF.

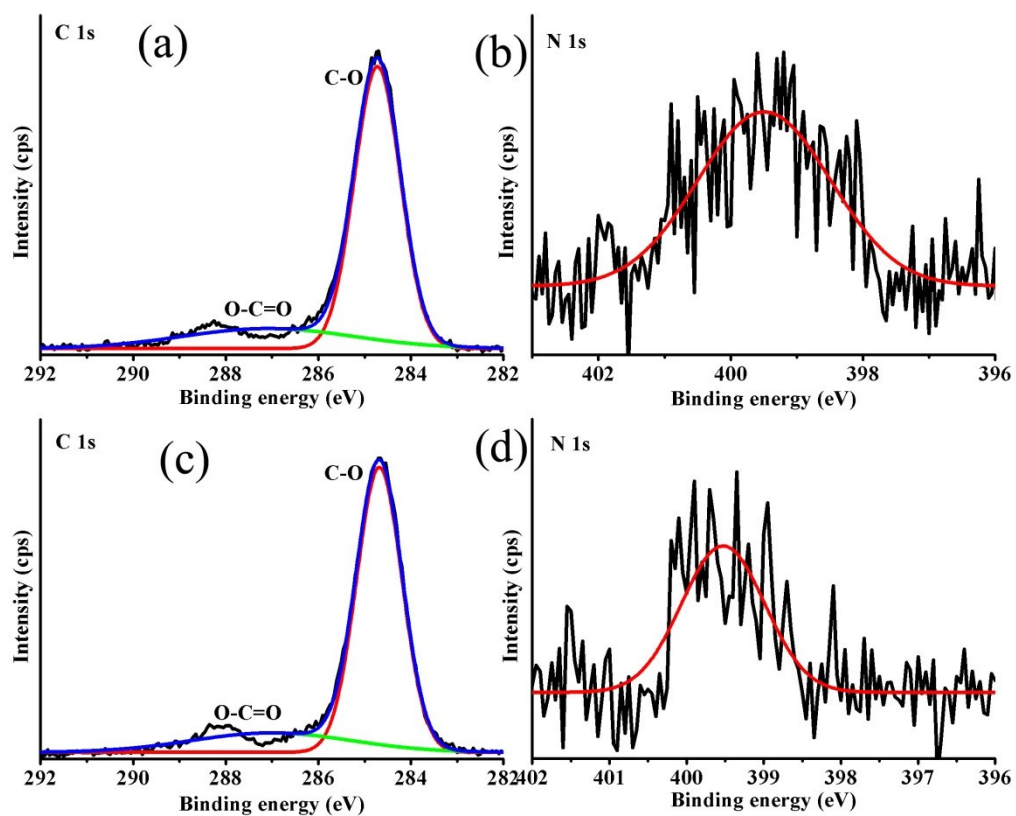

Figure S2. High resolution XPS spectra of C 1s and N 1s (a, b) Cu-Cu<sub>2</sub>O-CuO@NF and (c, d) Cu<sub>2</sub>O-CuO@NF.

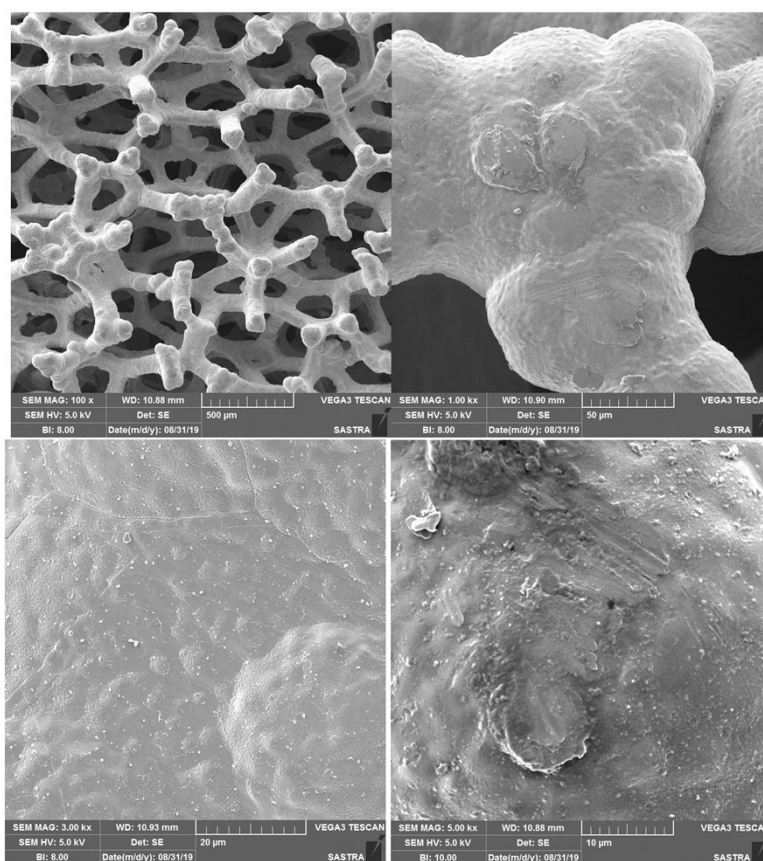

Figure S3. FE-SEM images of bare NF.

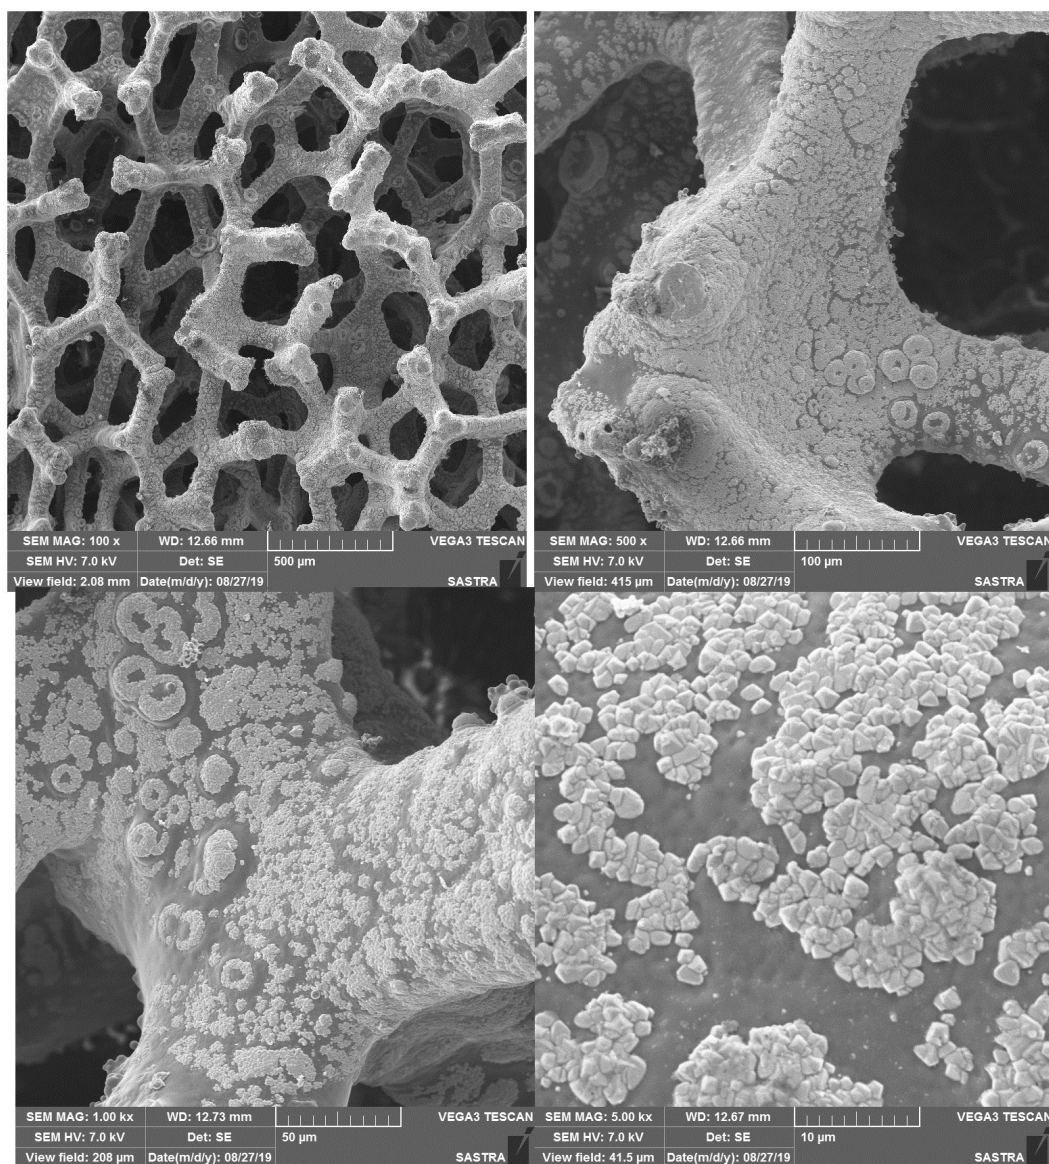

Figure S4. FE-SEM images of Cu@NF.

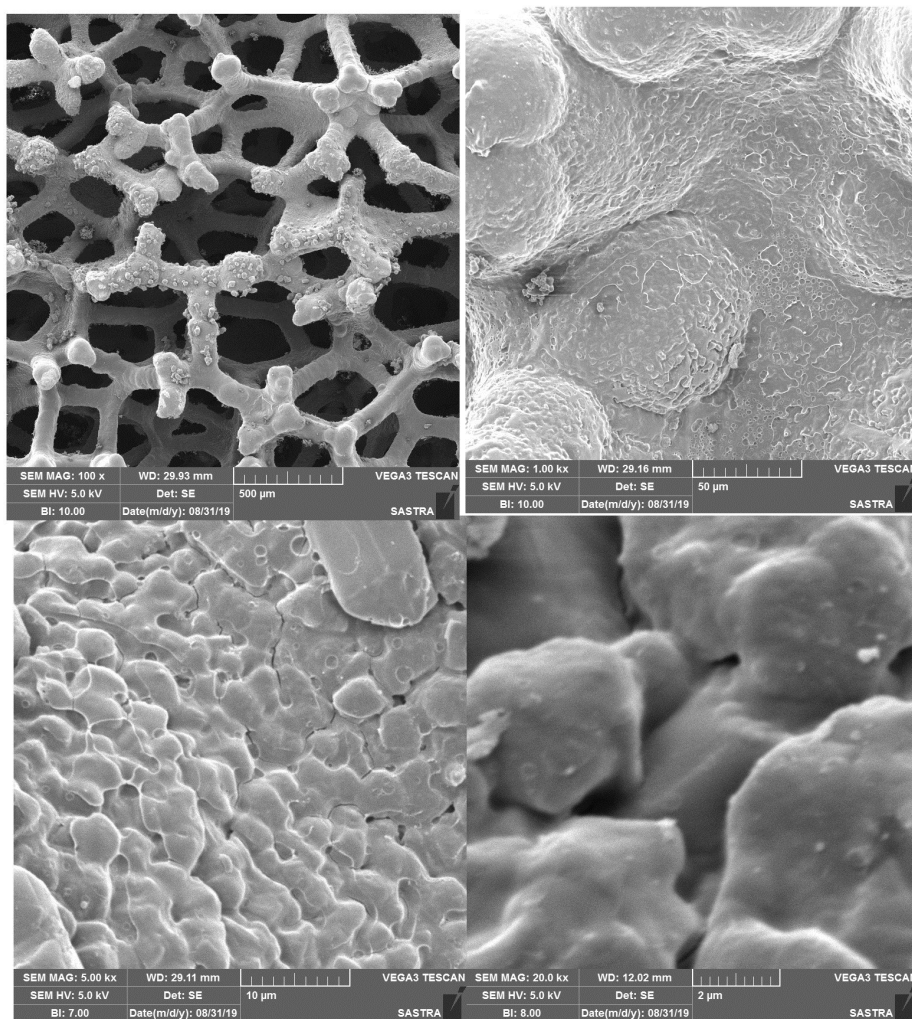

Figure S5. FE-SEM images of  $\text{Cu}_2\text{O}@NF$ .



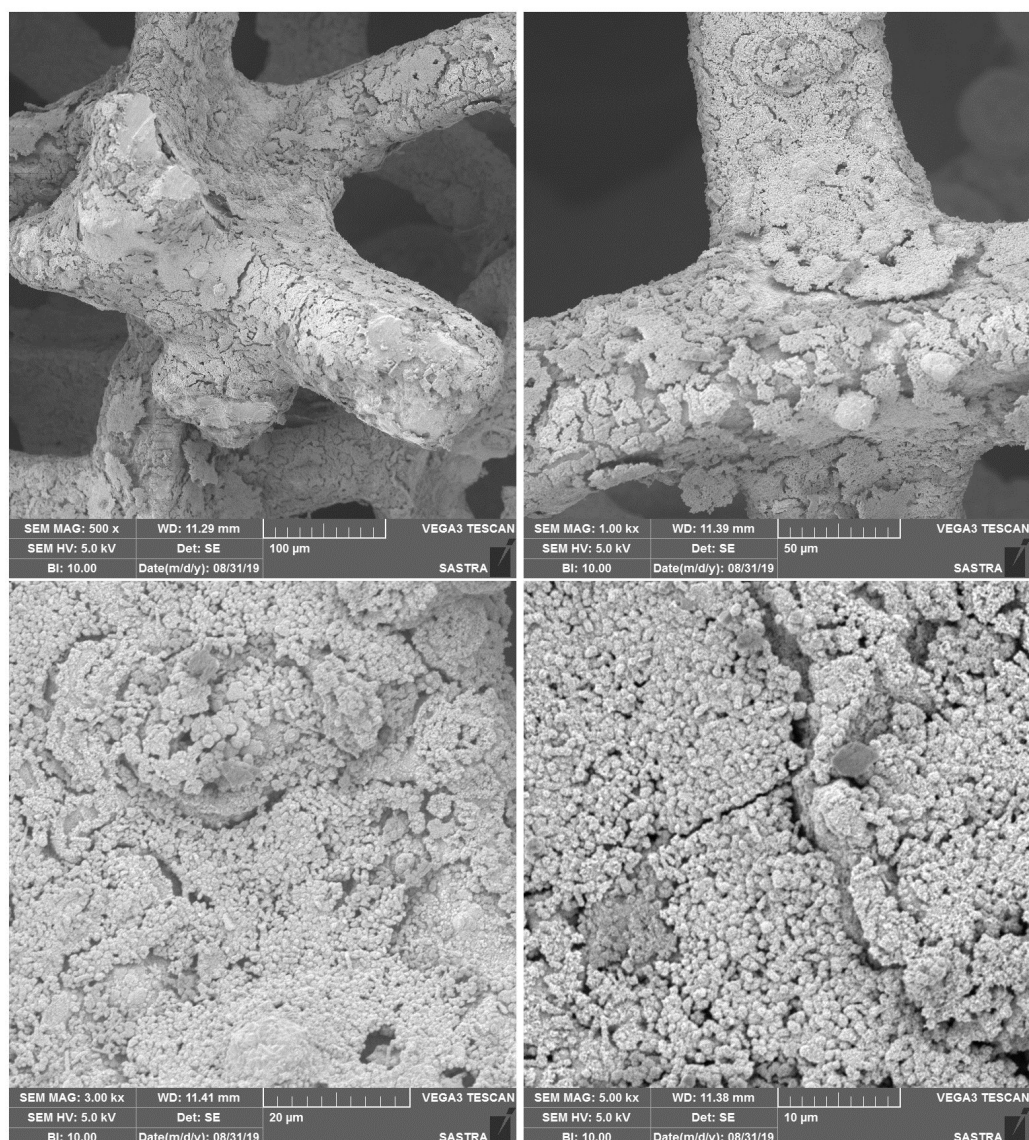

Figure S6. FE-SEM images of CuO@NF.

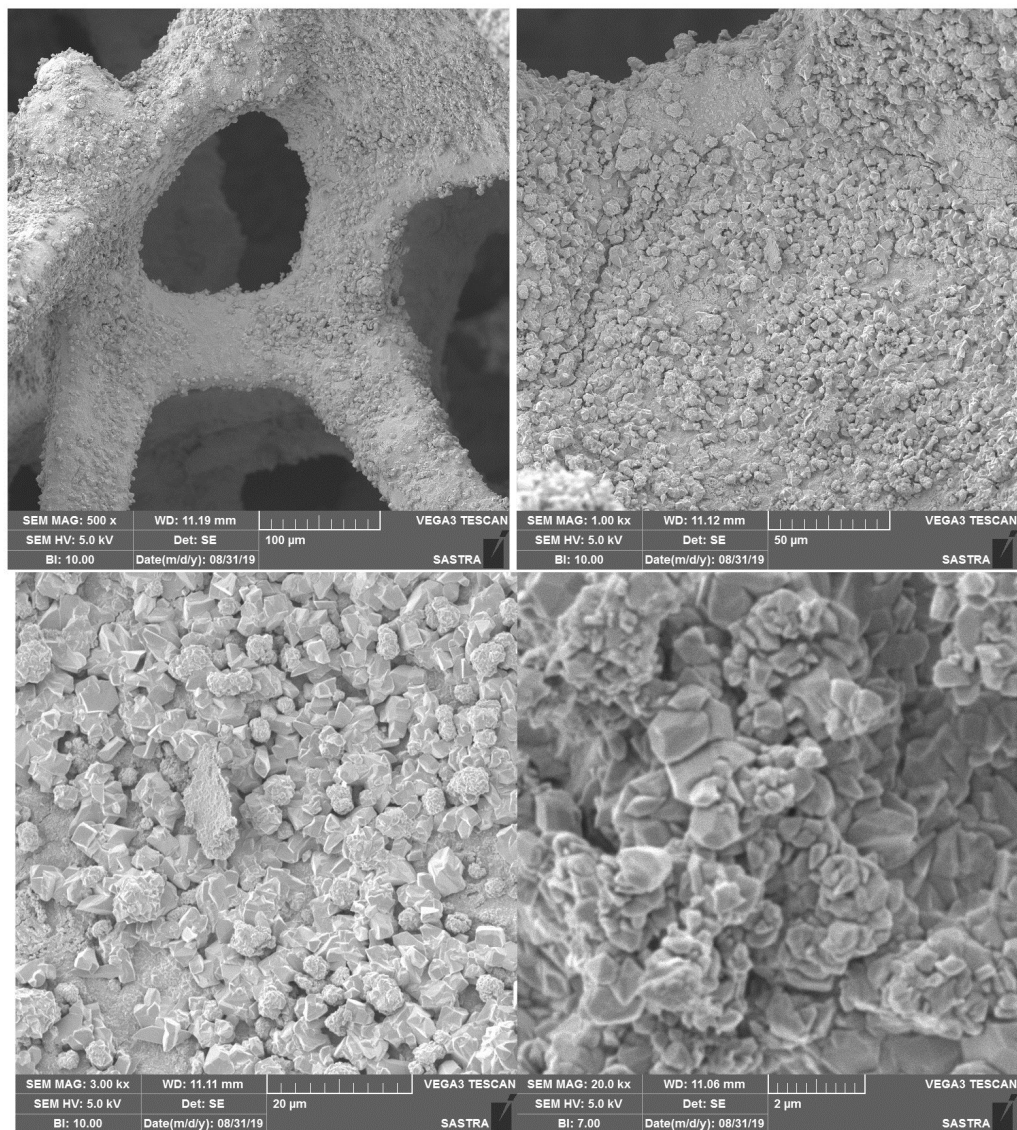

Figure S7. FE-SEM images of Cu-Cu<sub>2</sub>O-CuO@NF..

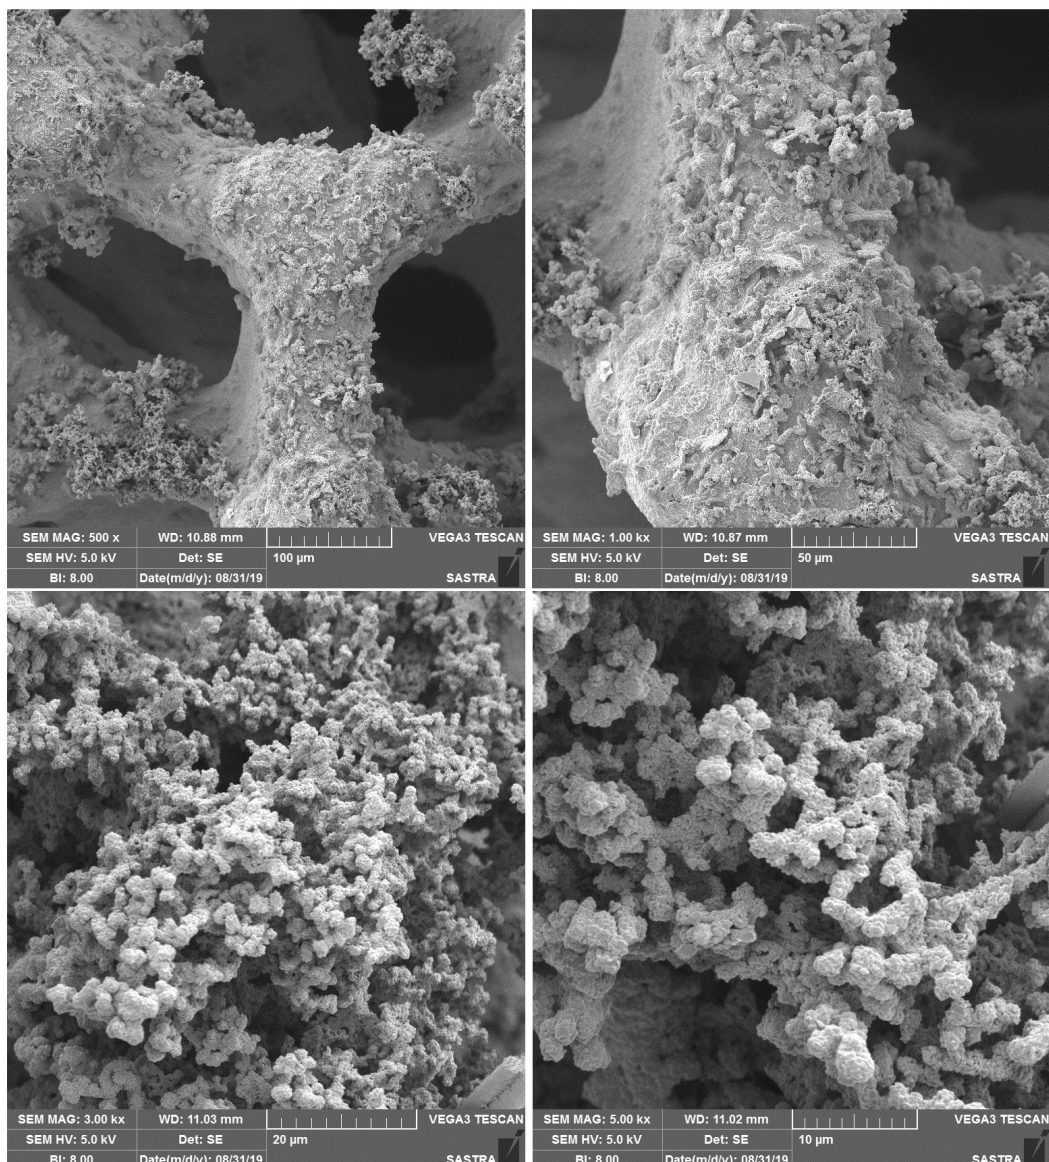

Figure S8. FE-SEM images of  $\text{Cu}_2\text{O-CuO@NF}$ .



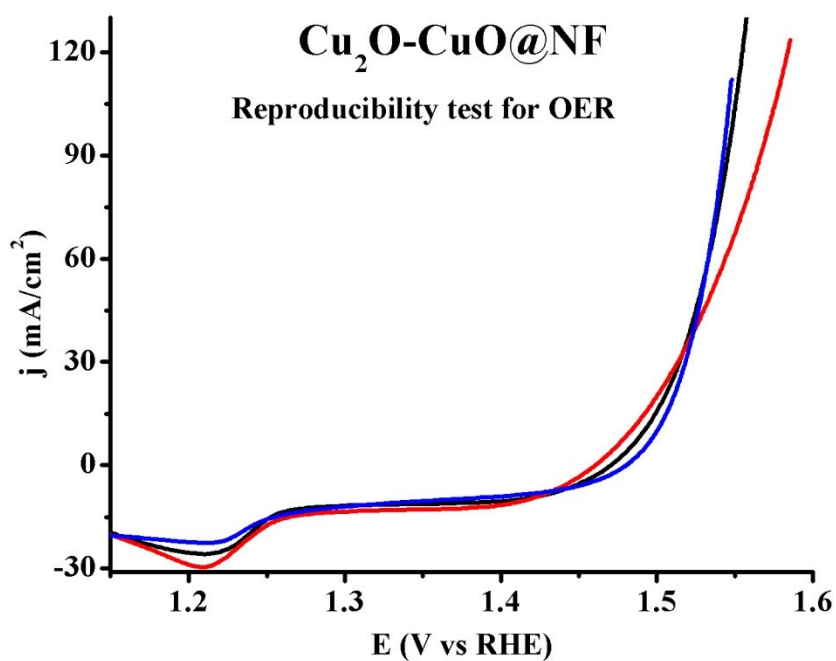

Figure S9. OER reproducibility of Cu<sub>2</sub>O-CuO@NF.

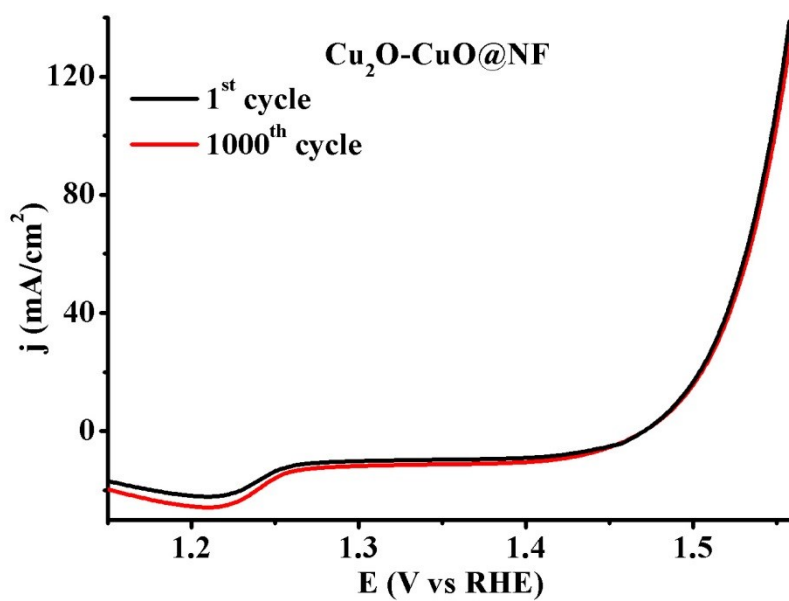

Figure S10. LSV OER curve of OER Cu<sub>2</sub>O-CuO@NF.

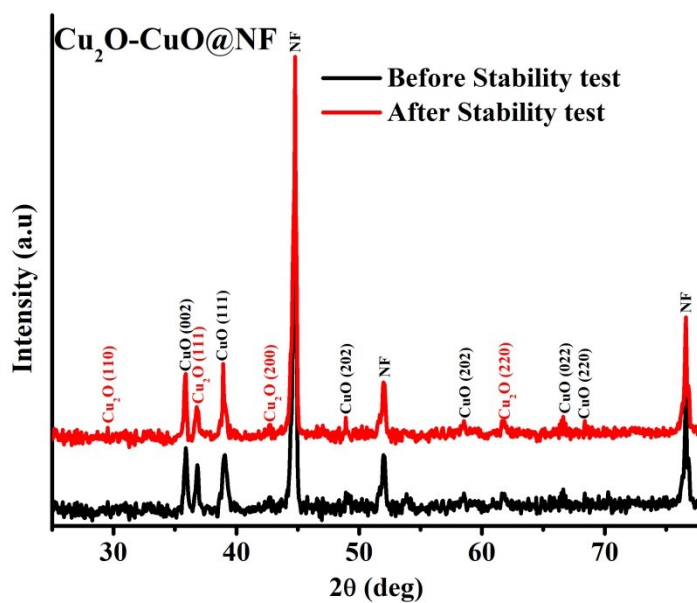

Figure S11. Comparison of PXRD pattern of  $\text{Cu}_2\text{O-CuO@NF}$  before and after the reaction.

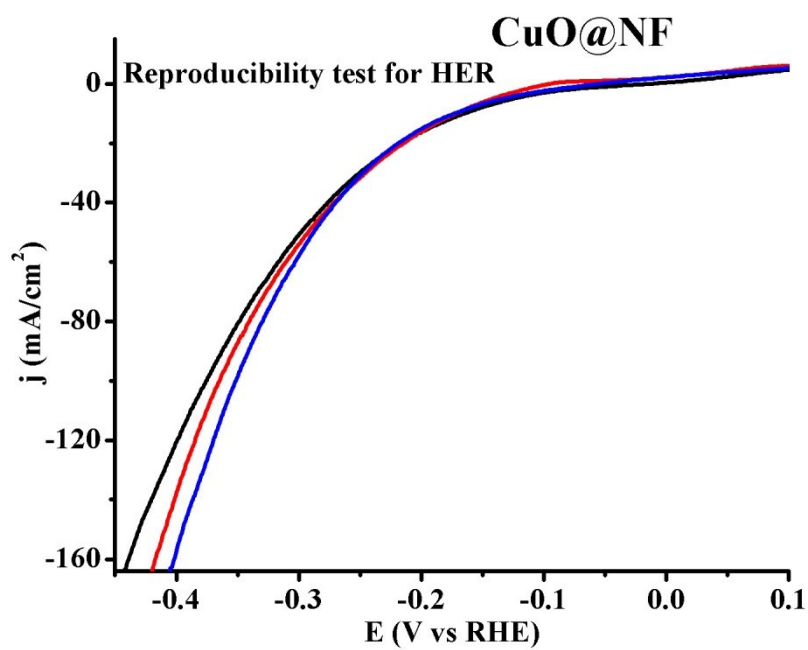

Figure S12. HER reproducibility of  $\text{CuO@NF}$ .

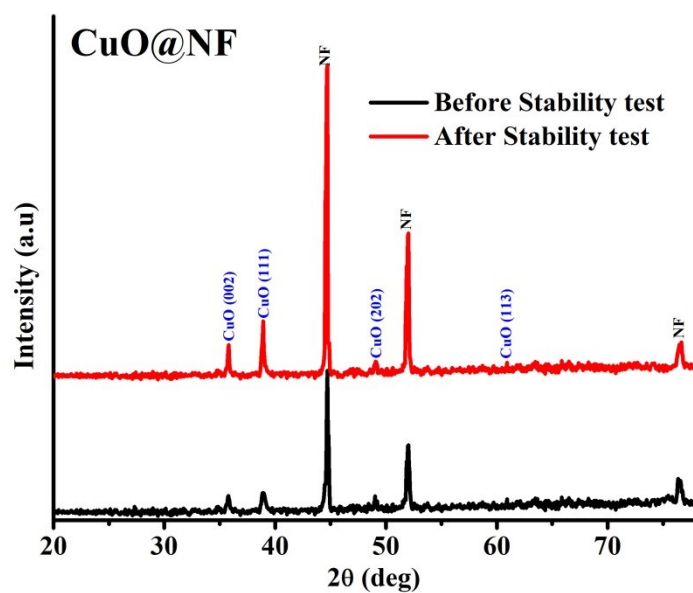

Figure S13. Comparison of PXRD pattern of CuO@NF before and after the reaction.

Table S1. Comparison of OER activities of different copper catalysts.

| Catalyst                                                 | $\eta_{10j}$ (mV) | Stability                    | Ref                 |
|----------------------------------------------------------|-------------------|------------------------------|---------------------|
| <b>Cu<sub>2</sub>O-CuO/NF</b>                            | <b>262</b>        | <b>1000 cycle &amp; 24 h</b> | <b>Present work</b> |
| Cu <sub>1-x</sub> Ni <sub>x</sub> S/NF                   | 350 (20 j)        | NA                           | 1                   |
| Cu(OH) <sub>2</sub> -Ni <sub>2</sub> O <sub>3</sub> H/NF | 319               | 10 h                         | 2                   |
| Pt-Cu@Cu <sub>x</sub> O NWs/<br>3DF                      | 250               | NA                           | 3                   |
| CuCo <sub>2</sub> O <sub>4</sub>                         | 260               | 25 h                         | 4                   |
| Cu <sub>3</sub> P-300                                    | 310               | 20 h                         | 5                   |
| CuO/Ni@400                                               | 364               | 500 cycle 24 h               | 6                   |
| Cu <sub>2</sub> S@Cu                                     | 345 (20 j)        | 10 h                         | 7                   |
| CuO-Co <sub>0.2</sub> /GCE                               | 394               | NA                           | 8                   |
| CuO NSDs/CF                                              | 371               | 24 h                         | 9                   |
| CuO@NiP NA/CF                                            | 275 (30 j)        | 1000 cycle & 24 h            | 10                  |
| HS-CuO/C NDs                                             | 308               | 50 h                         | 11                  |

|                                    |            |                    |    |
|------------------------------------|------------|--------------------|----|
| Cu <sub>3</sub> P-450              | 290        | 1000 cycle & 18 h  | 12 |
| Cu <sub>3</sub> P NB/Cu            | 380        | 1000 cycle & 10 h  | 13 |
| Cu@CuO-C                           | 340        |                    | 14 |
| NiFe-LDH/CuO NRs                   | 290 (50 j) | 35 h               | 15 |
| CuCu <sub>3</sub> P/CuO            | 315        | 50 h               | 16 |
| Co-CuO NA/CF                       | 299 (50 j) | 1000 cycle & 15 h  | 17 |
| Fe <sub>2</sub> Cu <sub>5</sub> Ni | 280        | 1000 cycle & 25 h  | 18 |
| CuO                                | 350        | 10 h               | 19 |
| Cu/Cu <sub>2</sub> O/CuO on CuO    | 290        | 100 h              | 20 |
| Cu <sub>2</sub> S/CF               | 336 (20 j) | 1000 cycle & 10 h  | 21 |
| CuCo <sub>2</sub> O <sub>4</sub>   | 290 (20 j) | 25 h               | 22 |
| Cu <sub>2</sub> O@C                | 330        | 1000 cycle & 100 h | 23 |
| CoFe <sub>2</sub> O <sub>4</sub>   | 410 (5 j)  | 20000 sec          | 24 |
| CuFe <sub>2</sub> O <sub>4</sub>   | 450 (5 j)  | NA                 | 24 |
| Cu <sub>2</sub> O-Cu foam          | 350        | 50 h               | 25 |

Table S2. Comparison of HER activities of different copper catalysts.

| Catalyst                                              | $\eta_{10j}$ (mV) | Stability         | Electrolyte                          | Ref       |
|-------------------------------------------------------|-------------------|-------------------|--------------------------------------|-----------|
| CuO/NF                                                | 165               | 16 h              | 1.0 M KOH                            | This work |
| Cu <sub>3</sub> P                                     | 130               | 1000 cycle & 20 h | 1.0 M KOH                            | 26        |
| N-enriched porous carbon containing Cu/CuO            | 470 (50 j)        | NA                | 1.0 M KOH                            | 27        |
| C-Cu-DI                                               | 390               | 10000 sec         | 0.5 M H <sub>2</sub> SO <sub>4</sub> | 28        |
| Cu/Cu <sub>2</sub> O/Ni el (5 min)                    | 424               | 100 cycles        | 0.1 M H <sub>2</sub> SO <sub>4</sub> | 29        |
| Cu@Cu <sub>3</sub> P/NF                               | 218               | 48 h              | 1.0 M KOH                            | 30        |
| CFE-Cu <sub>2</sub> O-TiO <sub>2</sub>                | 114               | 24 h              | 1.0 M KOH                            | 31        |
| Cu/Cu <sub>2</sub> O-CuO/rGO                          | 105               | 15 h              | 1.0 M KOH                            | 32        |
| Ni-doped CuCo <sub>2</sub> S <sub>4</sub>             | 249               | 10 h              | 0.5 M H <sub>2</sub> SO <sub>4</sub> | 33        |
| Ag@Cu <sub>2</sub> O                                  | 108               | 20 h              | 1.0 M KOH                            | 34        |
| Co-Cu-W Oxide                                         | 103               | 10 h              | 0.1 M KOH                            | 35        |
| Ni <sub>3</sub> Cu <sub>1</sub> @NG-NC                | 122               | 80 h              | 1.0 M KOH                            | 36        |
| (Cu <sub>3</sub> (PO <sub>4</sub> ) <sub>2</sub> /Cu- | 145               | 1000 cycle        | 1.0 M KOH                            | 37        |

|                                           |     |           |                                      |    |
|-------------------------------------------|-----|-----------|--------------------------------------|----|
| BDC-150-6 foam                            |     | & 50 h    |                                      |    |
| Cu/Cu <sub>2</sub> O/Cu <sub>2</sub> S NT | ~86 | 40000 sec | 0.5 M H <sub>2</sub> SO <sub>4</sub> | 38 |

## References:

- 1 Y. Li, H. Su, J. Fu and X. Du, *Int. J. Hyd. Energy*, 2019, **44**, 11744-11753.
- 2 C. Li, B. Zhang, Y. Li, S. Hao, X. Cao, G. Yang, J. Wu and Y. Huang, *App. Cat. B*, 2019, **244**, 56-62.
- 3 D. T. Tran, H. T. Le, T. L. L. Doan, N. H. Kim and J. H. Lee, *Nano Energy*, 2019, **59**, 216-228.
- 4 S. M. Pawar, B. S. Pawar, P. T. Babar, A. T. A. Ahmed, H. S. Chavan, Y. Jo, S. Cho, J. Kim, B. Hou, A. I. Inamdar, S. Cha, J. H. Kim, T. G. Kim, H. Kim and H. Im, *App. Surf. Sci.*, 2019, **470**, 360-367.
- 5 S. M. Pawar, B. S. Pawar, P. T. Babar, A. T. A. Ahmed, H. S. Chavan, Y. Jo, S. Cho, J. Kim, A. I. Inamdar, J. H. Kim, H. Kim and H. Im, *Mater. Lett.*, 2019, **241**, 243-247.
- 6 A. Roy, H. S. Jadhav, M. Cho and J. G. Seo, *J. Industr. Eng. Chem.*, 2019, **76**, 515-523.
- 7 B. Ma, Z. Yang, Z. Yuan and Y. Chen, *Int. J. Hyd. Energy*, 2019, **44**, 1620-1626.
- 8 H. Xu, W. Liu, Y. Zhao, D. Wang and J. Zhao, *J. Coll. Inter. Sci*, 2019, **540**, 585-592.
- 9 Q. Zhou, T.-T. Li, W. Xu, H.-L. Zhu and Y. -Q. Zheng, *J. Mater. Sci.*, 2018, **53**, 8141-8150.
- 10 B. Zhang, S. Hao, Z. Ye and, Y. Yang, *Chem. Commun.*, 2018, **54**, 2393-2396.
- 11 B. Zhang, C. Li, G. Yang, K. Huang, J. Wu, Z. Li, X. Cao, D. Peng, S. Hao and Y. Huang, *ACS App. Mater. Interfaces*, 2018, **10**, 23807-23812.
- 12 J. Hao, W. Yang, Z. Huang and C. Zhang, *Adv. Mater. Interfaces*, 2016, **3**, 1600236.
- 13 S. Wei, K. Qi, Z. Jin, J. Cao, W. Zheng, H. Chen and X. Cui, *ACS Omega*, 2016, **6**, 1367-1373.
- 14 J.- X. Wu, C.- T. He, G.- R. Li and J.- P. Zhang, *J. Mater. Chem. A*, 2018, **6**, 19176-19181.
- 15 Q. Zhou, T.- T. Li, J. Qian, W. Xu, Y. Hu and Y.- Q. Zheng, *ACS App. Energy Mater.*, 2018, **1**, 1364-1373.
- 16 J. Du, F. Li, Y. Wang, Y. Zhu and L. Sun, *ChemElectroChem*, 2018, **5**, 2064-2068.
- 17 X. Xiong, C. You, Z. Liu, A. M. Asiri and X. Sun, *ACS Sus. Chem. Eng.*, 2018, **6**, 2883-2887.
- 18 Y. Dong, F. Sun, X. Li, M. Chu, N. Li, X. Li, L. Wang, D. Qu, Y. Dong, Z. Xie, Y. Lin and C. Zhang, *J. Electrochem. Soc.*, 2018, **165**, F1127-F1132.
- 19 S. M. Pawar, B. S. Pawar, B. Hou, J. Kim, A. T. A. Ahmed, H. S. Chavan, Y. Jo, S. Cho, A. I. Inamdar, J. L. Gunjekar, H. Kim, S. Cha and H. Im, *J. Mater. Chem. A*, 2017, **5**, 12747-12751.
- 20 T. N. Huan, G. Rouse, S. Zanna, I. T. Lucs, X. Xu, N. Menguy, V. Mougél and M. Fontecave, *Angew. Chem. Inter. Ed.*, 2017, **56**, 4792-4796.
- 21 L. He, D. Zhou, Y. Lin, R. Ge, X. Hou, X. Sun and C. Zheng, *ACS Cat.*, 2018, **8**, 3859-3864.
- 22 A. T. A. Ahmed, B. Hou, H. S. Chavan, Y. Jo, S. Cho, J. Kim, S. M. Pawar, S. Cha, A. I. Inamdar, H. Kim and H. Im, *Small*, 2018, **14**, 1800742.
- 23 H. Zhang, Z. Zhang, N. Li, W. Yan and Z. Zhu, *J. Catal.*, 2017, **352**, 239-245.
- 24 M. Li, Y. Xiong, X. Liu, X. Bo, Y. Zhang, C. Han and L. Guo, *Nanoscale*, 2015, **7**, 8920-8930.
- 25 H. Xu, J. -X. Feng, Y. -X. Tong and G.- R. Li, *ACS Catl.*, 2017, **7**, 986-991.
- 26 J. Hao, W. Yang, Z. Huang and C. Zhang, *Adv. Mater. Interfaces*, 2016, **3**, 1600236.
- 27 S. Cui, M. Qian, X. Liu, Z. Sun and P. Du, *ChemSusChem*, 2016, **9**, 1-10.
- 28 X. Wei, N. Li and X. Zhang, *App. Surf. Sci.*, 2017, **425**, 663-673.
- 29 N. Farahbakhsh and S. Sanjabi, *J. Industr. Eng. Chem.*, 2019, **70**, 211-225.
- 30 H. Zheng, X. Huang, H. Gao, G. Lu, W. Dong and G. Wang, *Chem. Eur. J.*, 2019, **25**, 1083-1089.
- 31 B. Long, H. Yang, M. Li, M.-S. Balogun, W. Mai, G. Ouyang, Y. Tong, P. Tsiakaras, S. Song, *App. Cat. B*, 2019, **243**, 365-372.
- 32 L. Ye and Z. Wen, *Chem. Commun.*, 2018, **54**, 6388-6391.
- 33 Y. Sun, D. Li, J. Lu, Y. Zhang, L. Li and J. Liang, *Cryst. Res. Technol.*, 2019, **54**, 1800248.
- 34 C. Song, Z. Zhao, X. Sun, Y. Zhou, Y. Wang and D. Wang, *Small*, 2019, **15**, 1804268.
- 35 D. Gao, R. Liu, J. Biskupek, U. Kaiser, Y.-F. Song, C. Streb, *Angew. Chem. Int. Ed.*, 2019, **58**, 4644-4648.
- 36 B. Liu, H.-Q. Peng, J. Cheng, K. Zhang, D. Chen, D. Shen, S. Wu, T. Jiao, X. Kong, Q. Gao, S. Bu, C.-S. Lee and W. Zhang, *Small*, 2019, 1901545.
- 37 J. Rong, F. Qiu, T. Zhang, Y. Fang, J. Xu and Y. Zhu, *Electrochimica Acta*, 2019, **313**, 179-188.
- 38 Y. Wei, W. He, P. Sun, J. Yin, X. Deng and X. Xu, *App. Surf. Sci.* 2019, **476**, 966-971.
